1

2

3

4

5 Unveiling the Psychological Traits of Multi-Marathoners: Insights from  
6 TIPI Personality Trait Analysis

7

8 Leo Lundy<sup>1</sup>, Richard B Reilly<sup>1 2 3</sup>, Neil Fleming<sup>1 4</sup>, Dominika Wilczyńska<sup>5</sup>

9 <sup>1</sup>Trinity Department of Mechanical, Manufacturing and Biomedical Engineering, Trinity College, The University of Dublin, Ireland

10 <sup>2</sup>School of Medicine, Trinity College, The University of Dublin, Ireland

11 <sup>3</sup>School of Engineering, Trinity College, The University of Dublin, Ireland

12 <sup>4</sup>Human Performance Laboratory, Department of Anatomy, School of Medicine, The University of Dublin, Ireland

13 <sup>5</sup> Faculty of Social and Humanities, University WSB Merito, 80-226 Gdańsk, Poland,

14 **\*Corresponding Author:**

15 E-mail: [lundyl@tcd.ie](mailto:lundyl@tcd.ie)

16 ¶¶These authors contributed equally to this work

17

**NOTE: This preprint reports new research that has not been certified by peer review and should not be used to guide clinical practice.**

## 18 Abstract

19 **Objectives:** Multi-marathoners, athletes dedicated to completing 100 or more marathons,  
20 represent a unique subculture within endurance sports. This study uses the Ten Item Personality  
21 Inventory (TIPI) test to explore their psychological traits. The study aims to identify the unique  
22 personality profiles of multi-marathoners and understand their implications for participation,  
23 performance, and well-being.

24 **Methods:** TIPI was used to describe personality and provide valuable insights into the  
25 tendencies for certain personality traits. TIPI was conducted via an online cross-sectional  
26 survey distributed to the multi-marathon community, which received 593 responses, 56% men  
27 (n=331, average age = 53.87 years, SD = 9.91), 44% women (n=261, average age = 54.06, SD  
28 10.56) from 22 countries. One respondent identified as another gender and was not included in  
29 the gender-based analysis. Cronbach's Alpha and Guttman's Lambda 6 were calculated to  
30 assess the internal consistency of the survey, and the results were statistically analysed using  
31 Mann-Whitney U tests, ANOVA Aligned Rank Transform (ART) tests, and Wilcoxon rank-  
32 sum post-hoc tests to highlight differences in emotional stability, openness, conscientiousness,  
33 extraversion, and agreeableness. Normative TIPI data from the original TIPI study served as a  
34 dataset for comparison. Additionally, Spearman's  $\rho$  based correlation was used to explore  
35 relationships between personality traits and other related variables from the multi-marathoner  
36 community collected from a previous study.

37 **Results:** The findings reveal distinctive personality traits among multi-marathoners. Compared  
38 to the general population, results show multi-marathoners displayed higher levels of  
39 conscientiousness ( $F(1,591) = 2.42, p < 0.001$  for gender), indicating strong self-discipline,  
40 organisation, and goal-oriented behaviour. They exhibited lower levels of emotional stability

41 (F (1,591) = 5.525,  $p < 0.001$  for age group) and openness (F (1,591) = 2.54,  $p < 0.001$  for age  
42 group), suggesting challenges in stress management and adaptability. Following significant  
43 results from the ANOVA ART tests, the Wilcoxon rank-sum post-hoc analysis revealed a  
44 significant gender difference in agreeableness, with women exhibiting higher levels of  
45 agreeableness compared to men ( $W = 50809$ ,  $p < 0.00091$ ). However, after applying the  
46 Bonferroni statistical correction, no significant differences were found between genders in  
47 conscientiousness or emotional stability. Additionally, there were no significant differences in  
48 personality traits across different age groups after applying the statistical correction. These  
49 findings suggest that while gender differences in agreeableness are robust, age-related  
50 differences in personality traits were not statistically significant in this study.

51 **Conclusion:** This study offers insights into the psychological traits of multi-marathoners,  
52 highlighting their high conscientiousness and lower emotional stability. Contrary to the initial  
53 hypotheses, no significant differences were found in openness, and age-related differences in  
54 personality traits were not statistically significant after applying the Bonferroni statistical  
55 correction. These findings suggest that while multi-marathoners possess distinct personality  
56 traits, the relationship between these traits and their engagement in endurance sports is more  
57 complex than initially anticipated. These insights can guide the development of interventions  
58 to foster resilience and sustained participation, enhancing their overall experience and success  
59 in multi-marathoning. Longitudinal studies to track changes in personality traits and explore  
60 effective psychological interventions for this unique athletic community would allow further  
61 insight.

## 62 Introduction

63 Multi-marathoning, the pursuit of completing multiple marathon events, represents a unique  
64 subculture within the broader context of endurance sports. The defining achievement for many  
65 multi-marathoners is reaching the milestone of completing 100 marathons, a feat that requires  
66 extraordinary dedication, perseverance, and resilience. While a wider-ranging observational  
67 study has documented the participatory nature of multi-marathoning(1), the psychological  
68 dimensions of this endurance sport are less understood.

69 However, recent research on endurance athletes has increasingly revealed significant mental  
70 health concerns within this population, including heightened levels of stress, anxiety, and  
71 depression (2, 3). These findings underscore the need for a more comprehensive examination  
72 of the psychological traits that may contribute to the challenges faced by multi-marathoners, or  
73 alternatively, support their success. Therefore, this study seeks to address this gap by  
74 investigating the psychological traits of multi-marathoners, with a focus on personality  
75 characteristics. The study integrates the Big Five Personality Model (4) and Goal Setting  
76 Theory (5) to provide a theoretical framework for understanding the relationship between  
77 personality traits and participation in multi-marathon events.

78 Personality is often associated with the uniqueness of an individual, encompassing the  
79 characteristics that explain a person's consistent patterns of feelings, thoughts, and behaviours  
80 (6). In a broader sense, personality can be understood as a complex integration of thoughts,  
81 emotions, and behaviours that provides direction and coherence to a person's life. Like the  
82 body, personality consists of both structures and processes, reflecting the combined influences  
83 of genetics (nature) and environmental factors. The concept of personality also includes the  
84 temporal aspect of human functioning, as it encompasses past memories, mental

85 representations of the present, and imaginations and expectations for the future (7). An  
86 important approach in personality psychology is trait theory, developed by, among others,  
87 Allport, Eysenck, Cattell, and Costa & McCrae. For this study, the Big Five Personality Model  
88 of Costa & McCrae were employed (4). This model categorises personality traits into five  
89 broad dimensions: openness to experience (characterised by imagination, creativity, and a  
90 preference for novelty and variety, with high scorers being more curious and open to new  
91 experiences); conscientiousness (involving traits like self-discipline, organisation, and  
92 dependability, with high conscientiousness associated with goal-oriented behaviours and  
93 careful planning); extraversion (reflecting the extent to which a person is outgoing, sociable,  
94 and energetic, with extraverts typically being more talkative and assertive, enjoying social  
95 interactions compared to introverts); agreeableness (including attributes such as trust, kindness,  
96 and empathy, with high agreeableness indicating a cooperative and compassionate nature); and  
97 neuroticism (encompassing emotional instability and the tendency to experience negative  
98 emotions such as anxiety, moodiness, and irritability, with higher levels of neuroticism  
99 associated with greater emotional reactivity, the opposite of emotional stability). This model  
100 provides a comprehensive framework for understanding these traits (6). Each of these  
101 dimensions can influence an athlete's approach to training, goal setting, and coping with multi-  
102 marathoning. For instance, high conscientiousness might drive focused training and goal-  
103 oriented behaviour, while low emotional stability could pose challenges in managing the stress  
104 and setbacks inherent in multi-marathon participation (4).

105 The Goal Setting Theory (5), proposes that clear, specific, and challenging goals, combined  
106 with appropriate feedback, lead to higher performance. The theory highlights several key  
107 principles, including goal specificity, goal difficulty, and the importance of commitment,  
108 feedback, and task complexity. Specific goals direct attention and effort, challenging goals  
109 stimulate persistence and motivation, and feedback allows individuals to adjust their strategies

110 and efforts accordingly. For multi-marathoners, these principles are particularly relevant, as  
111 the nature of their training and competition inherently involves long-term goals that require  
112 sustained commitment and adaptability. Understanding how their personality traits influence  
113 their goal-setting behaviours and resilience can offer valuable insights into the psychology  
114 factors behind sustained involvement (8).

115 In the context of multi-marathoning, these principles are crucial. Multi-marathoners, by the  
116 very nature of their sport, set and achieve a series of challenging goals over time, such as  
117 completing multiple marathons within a specific period. Understanding how their personality  
118 traits influence their goal-setting behaviours, resilience, and persistence can offer valuable  
119 insights into the psychological factors behind their sustained involvement. For instance, high  
120 levels of conscientiousness may drive goal planning and execution, while lower emotional  
121 stability might require more robust coping strategies to maintain commitment in the face of  
122 adversity.

123 Recent studies have explored the application of Goal Setting Theory in endurance sports. For  
124 example, Jackman et al. found that effective self-regulation and goal-setting were critical in  
125 achieving high performance in distance running (9) . Another study by Stenling et al. reviewed  
126 the application of Goal Setting Theory across various sports and found that tailored goal-setting  
127 interventions were particularly effective in enhancing the resilience and performance of  
128 endurance athletes (10). Further studies have provided valuable insights into the relationship  
129 between personality traits and athletic performance in endurance sports. Fenta, Awoke, and  
130 Berhanu (11) examined Ethiopian long-distance runners and found that certain personality  
131 traits, such as high conscientiousness and emotional stability, were strongly associated with  
132 athletic effectiveness, underscoring the importance of these traits in sustained high  
133 performance (11). Similarly, Lopez and Sánchez (12) profiled mountain running athletes and

134 observed that specific personality profiles, including high levels of openness and  
135 conscientiousness, contributed to success in the sport (12). Steca et al. compared the Big Five  
136 personality traits between athletes and non-athletes, finding that athletes generally scored  
137 higher in conscientiousness and extraversion, traits linked to both sports participation and  
138 success (13).

139 This study builds on previous observational research from a broader study that explored the  
140 participatory characteristics of the multi-marathoning community. In this broader study,  
141 through targeted survey questions, areas were explored such as motivation, diet, health,  
142 injuries, recovery and treatments (1).

143 By utilising TIPI, this study aims to describe specific personality traits and understand how  
144 they influence key psychological outcomes, such as goal-setting behaviours (such as achieving  
145 100 marathon completions) and overall well-being (physical and mental health), by integrating  
146 the Big Five Personality Model with Goal Setting Theory, providing an analysis of the  
147 psychological factors that contribute to both the challenges and successes experienced by  
148 multi-marathoners. Additionally, the study explores how these personality traits may differ  
149 from those in the general population and how they might relate to sustained participation in  
150 multi-marathoning events.

151 Based on these theoretical frameworks and recent literature, this study hypothesises that multi-  
152 marathoners will exhibit distinct personality traits compared to the general population, notably  
153 higher conscientiousness, emotional stability and openness (4, 12). It is further hypothesised  
154 that these traits will influence outcomes such as motivation, diet, health, injuries, recovery, and  
155 treatments, which in turn may impact on their performance and well-being in the sport (1, 5).

156 In summary, this article aims to unveil the psychological traits of multi-marathoners, providing  
157 an understanding of how personality influences their participation and performance.

## 158 Methods

### 159 Study Design

160 A cross-sectional survey, including the Ten Item Personality Inventory (TIPI) test, was  
161 conducted online via the Qualtrics platform (14, 15) , offering broad geographical reach and  
162 convenient participation. Responses were collected from multi-marathoners worldwide during  
163 the study period, from December 14, 2023, to March 31, 2024.

164 Inclusion criteria required respondents to be individuals who had either achieved the goal of  
165 completing 100 marathons or had set this as their running goal and were actively engaged in  
166 the sport. Exclusion criteria disqualified individuals who had minimal marathon experience  
167 and had completed fewer than two marathons.

168 Gatekeepers were employed to distribute the survey and were identified through an analysis of  
169 the structure of multi-marathoning at national and international levels. The study team  
170 approached all national and international multi-marathon clubs and event companies based in  
171 the UK and Ireland. All major global multi-marathon clubs and UK/Ireland-based event  
172 companies agreed to support the survey distribution through their social media channels, email  
173 groups, and newsletters, which were generally accessible to anyone interested in the sport.

### 174 Personality Traits

175 Personality traits were assessed using the TIPI test (15). TIPI is a brief measure of the Big Five  
176 personality dimensions: openness, conscientiousness, extraversion, agreeableness, and



177 emotional stability. Each dimension is measured using two items rated on a 7-point Likert  
178 scale, ranging from 1 (disagree strongly) to 7 (agree strongly). TIPI item scoring (including  
179 reverse scoring) into personality dimensions was as detailed by Gosling et al. (15). TIPI is a  
180 validated tool widely used in psychological research for reliability.

181 Figure 1 shows the TIPI items gathered in this study.

182 *Figure 1 TIPI test*

183

## 184 Procedure

185 Respondents accessed the online survey via a secure link distributed through social media  
186 channels and email lists of multi-marathon clubs and event organisations. Participation was  
187 voluntary and anonymous, with informed consent obtained from all respondents via the survey  
188 platform before their involvement, ensuring ethical standards were upheld.

## 189 Statistical Analysis

190 Data were analysed using R, a statistical software package (16). Descriptive statistics were  
191 computed to summarise the demographic characteristics of the sample and the distribution of  
192 TIPI scores (15).

193 Normative data from the original TIPI study was used as a benchmark for comparison by age  
194 group and gender (17). This provided a large relevant normative dataset (>300,000) for the Big  
195 Five personality dimensions in the general population grouped by gender and age group.

196 Due to the mixed nature of the data, assumptions of normality and homoscedasticity were not  
197 applied, and statistical analysis tests were chosen that were appropriate to the mix of data under  
198 analysis.

199 Cronbach's Alpha and Guttman's Lambda 6 were calculated to assess the internal consistency  
200 and reliability of the survey (18). Mann-Whitney U tests were conducted on TIPI traits, which  
201 were ordinal in nature, to ascertain if there was statistical significance of any differences  
202 between survey and normative datasets. Mann-Whitney U tests were performed across age  
203 groups by gender (men=1, women=2) between the survey dataset and the normative dataset  
204 (13, 19). ANOVA Aligned Rank Transform (ART) Tests were used to examine the effects of  
205 gender and age group on various personality traits (20). Wilcoxon Rank-Sum Post-hoc tests  
206 identified specific pairwise comparisons with significant differences, when comparing  
207 different genders and age groups (21). Spearman's Rank Correlation helped explore the  
208 relationships between personality traits and other various multi-marathon co-variates, where  
209 TIPI traits were correlated against relevant data from the previous observational study into  
210 multi-marathoning (1). This highlighted any significant correlations between personality traits  
211 and the various multi-marathon covariate outcomes, based on Spearman's  $\rho$  (22).

212 To facilitate analysis of goal setting behaviour and correlation analysis, data from the wider-  
213 ranging observational study on multi-marathoning were analysed against TIPI results to  
214 examine goal setting behaviour and correlations across the different datasets (1). For ease of  
215 analysis, the observational study data were aggregated into correlation groups and presented in  
216 the same gender and age groups as this study data. These aggregated correlation data groups  
217 (gathered from targeted survey questions in the wider-ranging observational study) included  
218 diet, such as plant-based diets (vegan and vegetarian) and omnivorous diets (including regular,  
219 paleo, and Pesco-vegetarian); motivation, encompassing factors like achievement and

220 recognition (e.g., competition, performance, awards, accomplishment), lifestyle and health  
221 (e.g., way of life, keeping fit), milestones and goals (e.g., running streaks, race series, race  
222 numbers, milestones), and social and enjoyment factors (e.g., travel, social life); health,  
223 covering conditions such as diagnosed heart issues, high blood pressure, balance problems,  
224 tendon and bone issues, and other chronic conditions; and injuries, which included categories  
225 such as joint and muscle injuries, common running injuries (e.g., IT band syndrome, plantar  
226 fasciitis, tendonitis, shin splints, runner's knee), severe issues (e.g., stress fractures, frostbite,  
227 heat exhaustion), minor issues (e.g., blisters, chafing), and various treatment methods like self-  
228 care (e.g., rest, ice, compression, elevation, foam rolling, stretching, strapping), medication  
229 (e.g., pain medication), alternative therapies (e.g., acupuncture), and medical interventions  
230 (e.g., surgery). This data organisation facilitated a clearer understanding of the correlations  
231 within and across these different categories.

## 232 Results

### 233 Participants

234 A total of 593 responses were received in the cross-sectional survey of this study, 56% men  
235 (n=331, average age = 53.87 years, SD = 9.91), 44% women (n=261, average age = 54.06, SD  
236 10.56). Only one respondent identified as another gender and was not included in the gender-  
237 based analysis. Respondents from 22 different countries across 6 continents participated, with  
238 leading countries being Ireland, UK, Germany, Finland, Italy, and the US, which is a good  
239 reflection of those countries foremost in multi-marathoning according to the multi-marathoning  
240 world rankings, thus ensuring good representation of the multi-marathon community(23). The  
241 high average marathon completion count (M:146.52 SD:196.3) among respondents further  
242 assured that the sample represented the target community. A resolution measure of  $\pm 1$  year for  
243 age and  $\pm 1$  marathon for the number of marathons completed was applied, acknowledging

244 minor variances in self-reported data while maintaining the precision necessary for reliable  
245 analysis.

## 246 Personality Traits

247 TIPI scores for the respondents were analysed and compared to normative data from the  
248 original TIPI study (17). Figure 2 shows the means and standard deviations (M/SD) for each  
249 TIPI survey personality trait by age group and gender and the comparisons against the TIPI  
250 normative dataset, showing differences in agreeableness, conscientiousness and emotional  
251 stability across age groups and genders. This highlights how multi-marathoners differ from the  
252 general population in terms of personality traits. It should be noted that agreeableness and  
253 emotional stability saw significant negative difference across all age groups and genders, and  
254 higher conscientiousness was only evident in women.

255 *Figure 2 Comparison of Survey TIPI results against TIPI Normative data.*

256

257 Cronbach's alpha (0.42) and Guttman's Lambda 6 (0.40) revealed lower reliability compared  
258 to longer personality assessments (15, 18, 24, 25). However, this level of reliability is  
259 considered moderate within the context of ultra-brief scales like the TIPI, which assesses five  
260 traits using only 10 items. The trade-off between brevity and internal consistency is well-  
261 documented for such scales, where the focus is on efficiency rather than high internal  
262 consistency (15, 24, 25). This trade-off was accepted by the research team for the purposes of  
263 this study.

264 Mann-Whitney U tests showed agreeableness, conscientiousness, and emotional stability had  
265 statistically significant differences with  $\alpha = 0.05$  and a Bonferroni statistical correction of

266 50 (5 traits by 10 age groups), with  $p < 0.001$  (significant),  $P < 0.0002$  (very significant),  $p$   
 267  $< 0.00002$  (extremely significant).

268 Table 1 shows the p-values of Mann Whitney U tests for all traits of TIPI when compared  
 269 against the normative dataset. In all the older age groups agreeableness, conscientiousness  
 270 (women only), and emotional stability saw significant differences to the normative dataset.

271 *Table 1 P-value results for Mann Whitney U tests by age group and gender (men =1, women =2).*

| Age Category | Gender | Extraversion | Agreeableness | Conscientiousness | Emotional Stability | Openness |
|--------------|--------|--------------|---------------|-------------------|---------------------|----------|
| 21-30        | 1      | 0.118        | 0.109         | 0.343             | 0.886               | 0.3223   |
| 31-40        | 1      | 0.471        | <0.00002      | 0.61              | 0.069               | 0.0051   |
| 41-50        | 1      | 1            | <0.00002      | 0.722             | <0.00002            | 0.4515   |
| 51-60        | 1      | 0.003        | <0.00002      | 0.001             | <0.00002            | 0.0001   |
| 61 and older | 1      | 0.17         | <0.00002      | 0.001             | <0.00002            | 0.9231   |
| 21-30        | 2      | 0.2          | 0.396         | 0.398             | 0.202               | 1        |
| 31-40        | 2      | 0.204        | 0.002         | 0.031             | 0.039               | 0.314    |
| 41-50        | 2      | 0.064        | <0.00002      | <0.00002          | <0.00002            | 0.194    |
| 51-60        | 2      | 0.148        | <0.00002      | <0.00002          | <0.00002            | 0.085    |
| 61 and older | 2      | 0.401        | <0.00002      | <0.00002          | <0.00002            | 0.685    |

273 **ANOVA Aligned Rank Transform Results**

274 **ANOVA Aligned Rank Transform (ART)** tests were conducted on TIPI traits to examine the  
 275 effects of Gender and Age groups and their interaction. Alpha = 0.05 with  $p < 0.05$  (significant),  
 276  $P < 0.001$  (very significant),  $p < 0.0001$  (extremely significant).

277 *Table 2 ANOVA ART results examining the effects of Gender and Age Group on Traits*

| Trait               | Gender.F | Gender.p | Age.F | Age.p  | Interaction.F | Interaction.p | Effect.Type |
|---------------------|----------|----------|-------|--------|---------------|---------------|-------------|
| Extraversion        | 0.188    | 0.665    | 2.749 | 0.028  | 0.548         | 0.701         | Age Group   |
| Agreeableness       | 3.307    | 0.069    | 4.978 | <0.001 | 0.636         | 0.637         | Age Group   |
| Conscientiousness   | 4.593    | 0.033    | 2.421 | 0.047  | 1.506         | 0.199         | Gender      |
| Emotional Stability | 2.072    | 0.151    | 5.525 | <0.001 | 0.774         | 0.542         | Age Group   |

|          |       |       |       |       |       |       |           |
|----------|-------|-------|-------|-------|-------|-------|-----------|
| Openness | 1.219 | 0.270 | 2.539 | 0.039 | 1.450 | 0.216 | Age Group |
|----------|-------|-------|-------|-------|-------|-------|-----------|

278 Table 2. shows the results of these ANOVA ART tests. Extraversion, agreeableness, emotional  
 279 stability, and openness showed significant differences primarily due to age group. In the case  
 280 of conscientiousness, there is a significant effect of both gender and age group. No significant  
 281 interaction effects between gender and age group were found for any of the traits.

282 As significant results were observed from the ANOVA ART tests, the Wilcoxon rank-sum  
 283 post-hoc analysis was applied to identify specific pairwise comparisons with significant  
 284 differences in personality traits. This allowed the differences between gender, age groups, W  
 285 statistic and p-value for each significant comparison to be detailed at an alpha level of 0.05. As  
 286 55 pairwise post hoc tests were performed (5 traits by (10 age groups plus gender)) a Bonferroni  
 287 correction of 55 was applied to alpha with the resultant  $p < 0.00091$  (significant),  $p < 0.000018$   
 288 (very significant), and  $p < 0.0000018$  (extremely significant).

289 The results of the Wilcoxon rank-sum post-hoc tests are shown in Table 3 and once the  
 290 Bonferroni statistical correction is considered there is only a significant difference found in  
 291 agreeableness where women demonstrate higher levels of agreeableness to men.

292 *Table 3 Wilcoxon rank-sum post-hoc tests by Gender (men =1, women = 2) and Age-Group*

| Trait               | Effect Type                      | W statistic | p-value |
|---------------------|----------------------------------|-------------|---------|
| Agreeableness       | Gender: 1 vs 2                   | 50809       | <0.0009 |
| Agreeableness       | Age Group: 61 and older vs 21-30 | 191         | 0.004   |
| Conscientiousness   | Gender: 1 vs 2                   | 36638.5     | 0.001   |
| Emotional Stability | Gender: 1 vs 2                   | 36956.5     | 0.002   |

293 These findings highlight the complex impact of demographic factors on personality dimensions  
 294 and underscore the importance of considering personality traits when developing support

295 mechanisms and interventions aimed at enhancing the well-being and performance of multi-  
296 marathoners.

297 **Goal Setting Behaviour and Correlations compared with data from previous**  
298 **broader observational study.**

299 As part of the previous broader observational study into participation characteristics of multi-  
300 marathoners, its cross-sectional survey had a total of 830 responses: 60.69% men (n=502,  
301 average age = 51.6 years, SD=9.96) and 39.3% women (n=326, average age = 48.83 years,  
302 SD=9.15). A small proportion (0.1%) identified as gender variant/non-conforming and were  
303 excluded from gender-based analysis. Data including diet, motivation, injury, recovery,  
304 treatment, and health were gathered using targeted survey questions. These questions are  
305 detailed in the reference for further consultation (1).

306 While goal setting is inherent in multi-marathoners (achieving 100 marathon completions) goal  
307 setting behaviour was further analysed in the motivation related survey questions of the broader  
308 observational study, which including questions covering achievement, recognition, milestones,  
309 and goals (1).

310 Results from this broader observational study showed most motivations identified were  
311 intrinsic, with maintaining fitness and health being the most common (18.32%). This was  
312 followed closely by a sense of accomplishment (16.26%) and multi-marathoning as a way of  
313 life (13.62%). Social engagement also played a significant role (11.53%), alongside  
314 motivations such as travel (8.82%) and reaching specific milestones (8.3%).

315 For men with fewer than 100 marathon completions, motivations were largely centred on  
316 continuous improvement and competition. However, among men with over 100 completions,  
317 these motivations shifted, with travel and social engagement becoming the primary driving

318 factors. In contrast, women prioritised social life across both groups, but for those with fewer  
319 than 100 marathon completions, reaching milestones was particularly important as was travel  
320 and social engagement.

321 In terms of extrinsic motivations, many multi-marathoners were members of multi-marathon  
322 awards clubs. Notably, 45% of respondents identified achieving 100 marathon completions and  
323 earning the associated 100-marathon award from their national club as their most significant  
324 goal.

325 To extend the analysis with this previous multi-marathon wider-ranging study, correlations  
326 using Spearman's  $\rho$  were applied between TIPI traits from this study and all data from the  
327 previous multi-marathon observational study into participation in multi-marathoning including  
328 diet, motivation, injury, recovery, treatment, and health. (1, 22). Spearman's  $\rho$  is categorised  
329 into significance levels 0-0.19: Very Weak, 0.2-0.39: Weak, 0.4-0.59: Moderate, 0.6-0.79:  
330 Strong, 0.8-1: Very Strong. The correlation analysis found 9 occurrences of Strong or Very  
331 Strong significance levels across correlations.

332 Table 4. details the results from this correlation analysis where the correlation had a strong or  
333 very strong significance between the TIPI traits from this study and all data from the previous  
334 broader study.

335 *Table 4 Strong or Very Strong significance levels (Spearman's  $\rho$ ) of correlations of TIPI TRAITS*

| TIPI Trait          | Correlated variables        | Spearman's $\rho$ |
|---------------------|-----------------------------|-------------------|
| Extraversion        | Health: High Blood Pressure | -0.62             |
| Agreeableness       | Health: Chronic illness     | -0.67             |
| Emotional Stability | Health: High Blood Pressure | -0.82             |
| Emotional Stability | Health: Balance             | 0.7               |



|                     |                                  |       |
|---------------------|----------------------------------|-------|
| Agreeableness       | Motivation: Social and Enjoyment | -0.71 |
| Extraversion        | Injury: Minor Issue              | 0.64  |
| Extraversion        | Injury: Running Injury           | -0.69 |
| Emotional Stability | Injury: Minor Issue              | 0.66  |
| Emotional Stability | Injury: Running Injury           | -0.78 |

336 Extraversion is negatively correlated with blood pressure ( $\rho = -0.62$ ) and running injuries ( $\rho =$   
337  $-0.69$ ), indicating that more extraverted individuals tend to have lower blood pressure and are  
338 prone to fewer running-related injuries. Additionally, higher extraversion is positively  
339 correlated with a greater incidence of minor skin issues ( $\rho = 0.64$ ), suggesting that more  
340 extraverted individuals may be more prone to minor skin problems.

341 Agreeableness is negatively correlated with chronic illness ( $\rho = -0.67$ ), meaning that more  
342 cooperative and empathetic individuals tend to report fewer chronic health conditions.  
343 Interestingly, agreeableness is also negatively correlated with motivation related to social and  
344 enjoyment factors ( $\rho = -0.71$ ), possibly indicating that individuals who score high in  
345 agreeableness may be less driven by social motivations in multi-marathoning, which could  
346 seem counterintuitive but warrants further exploration.

347 Emotional stability is strongly negatively correlated with high blood pressure ( $\rho = -0.82$ ) and  
348 a lower incidence of running injuries ( $\rho = -0.78$ ), suggesting that more emotionally stable  
349 individuals tend to have better physical health outcomes in these areas. Additionally, emotional  
350 stability is positively correlated with better physical balance ( $\rho = 0.70$ ) and fewer minor skin  
351 issues ( $\rho = 0.66$ ), indicating that emotionally stable individuals may also have better physical  
352 coordination and fewer minor injuries.

353 These results show that while a strong or very strong correlation can be made between  
354 personality traits and some hypothesised outcomes (such as motivation, injury, and health),  
355 other variables such as diet, recovery, and treatment showed moderate or weak correlations to  
356 personality traits contrary to initial expectations.

## 357 Discussion

### 358 Principal Findings

359 This study aimed to investigate the psychological traits of multi-marathoners, focusing on their  
360 personality profiles as assessed by the Ten Item Personality Inventory (TIPI) (15, 17). The  
361 findings reveal significant differences in specific personality dimensions between multi-  
362 marathoners and the general population. Specifically, multi-marathoners exhibited higher  
363 levels of conscientiousness and lower levels of emotional stability. However, contrary to  
364 expectations, no significant differences were observed in openness, and age-related differences  
365 in personality traits were not statistically significant after applying the Bonferroni correction.  
366 Additionally, the study found a significant gender difference in agreeableness, with women  
367 displaying higher levels compared to men. However, no significant gender differences were  
368 observed in conscientiousness or emotional stability after applying the Bonferroni correction.

### 369 Interpretation of Results

370 The higher levels of conscientiousness observed among women suggest that they possess  
371 strong self-discipline, organisation, and goal-oriented behaviours (6). These traits are essential  
372 for the physical demands and persistence required to complete multiple marathons.  
373 Conscientious individuals are likely to be methodical in their preparation, setting and adhering  
374 to long-term goals, which aligns well with the demands of multi-marathoning.

375 Conversely, the lower levels of emotional stability indicate that multi-marathoners may face  
376 challenges in managing stress and regulating emotions. Emotional stability, often referred to  
377 as neuroticism in the Big Five Personality Theory, relates to an individual's tendency to  
378 experience negative emotions such as anxiety, moodiness, and irritability. The demands of  
379 continuous multi-marathoning can be significant stressors, and lower emotional stability may  
380 exacerbate these challenges, potentially leading to higher levels of psychological distress (4).

381 The absence of significant differences in openness does not support the initial hypothesis that  
382 multi-marathoners would exhibit higher levels of this trait due to the adventurous nature of the  
383 sport. This might suggest that while multi-marathoners engage in a physically demanding and  
384 challenging activity, they may prefer the structured and predictable aspects of their event  
385 routines.

#### 386 [Gender and Age Effects](#)

387 The analysis indicated a significant gender difference in agreeableness, with women  
388 demonstrating higher levels than men. This suggests that while women may excel in  
389 cooperative and compassionate behaviours, the anticipated gender differences in  
390 conscientiousness and emotional stability did not hold after statistical correction. Additionally,  
391 the expected age-related trends were not statistically significant after applying the Bonferroni  
392 correction, indicating that older age groups did not exhibit the anticipated lower levels of  
393 agreeableness and emotional stability or higher levels of openness. This suggests that the  
394 interaction between age and personality traits might be more complex than initially  
395 hypothesised.

## 396 Theoretical Implications

397 The findings of this study can be interpreted through the frameworks of the Big Five  
398 Personality Theory and Goal Setting Theory. The Big Five Personality Theory provides a  
399 robust framework for understanding how individual differences in personality traits influence  
400 behaviour (6). In this context, high conscientiousness and low emotional stability among multi-  
401 marathoners highlight the dual aspects of persistence and vulnerability within this group.

402 Goal Setting Theory complements these insights by emphasising the importance of clear,  
403 challenging goals and sustained commitment to achieving multi-marathon goals. The strong  
404 goal-oriented behaviour associated with high conscientiousness supports the notion that multi-  
405 marathoners are particularly adept at setting and pursuing long-term objectives, which is crucial  
406 for their sport (5).

## 407 Practical Implications

408 Understanding the personality traits of multi-marathoners has practical implications for  
409 designing interventions aimed at optimising their well-being and performance. Given the high  
410 levels of conscientiousness among women, support programmes should leverage this trait by  
411 providing structured gender-specific training plans and goal-setting workshops that align with  
412 their methodical approach to marathon preparation.

413 For those with lower emotional stability, psychological support mechanisms such as stress  
414 management training, resilience building, and access to mental health resources are essential.  
415 These interventions can help multi-marathoners better manage the psychological demands of  
416 their sport and mitigate the risks associated with lower emotional stability (26).

417 Since the findings didn't show a strong link between openness (a personality trait likely  
418 involving adaptability, creativity, or willingness to experience new things) and performance,  
419 support programs may not need to focus heavily on fostering these qualities. However, it is still  
420 important to keep athletes motivated and engaged using diverse training methods.

#### 421 [Intervention](#)

422 The insights gained from this research can inform interventions designed to address and  
423 enhance the psychological resilience and overall well-being of multi-marathoners, ensuring  
424 they achieve their race goals while also maintaining a balanced and healthy psychological state.

#### 425 [Future Research Directions](#)

426 Future research should explore longitudinal changes in personality traits among multi-  
427 marathoners to understand how their personality profiles evolve with continued participation  
428 in the sport. Investigating the impact of specific interventions designed to enhance  
429 psychological resilience and well-being can provide evidence-based strategies for supporting  
430 multi-marathoners (27).

431 Moreover, expanding the diversity of study samples to include a broader range of cultural,  
432 socioeconomic, and geographic backgrounds can enhance the generalisability of the findings  
433 and provide a more nuanced understanding of the psychological challenges faced by multi-  
434 marathoners globally.

## 435 Ethical Considerations

436 The study was conducted in accordance with the Declaration of Helsinki and received ethical  
437 approval from Trinity College Dublin's Faculty of Health Sciences Research Ethics Committee  
438 (FREC) Number 231005.

## 439 Limitations

440 While the study aimed to maintain respondent anonymity and reduce potential biases, several  
441 limitations should be noted:

442 **Selection Bias:** The survey distribution through gatekeepers in closed social media groups  
443 might introduce selection bias, affecting the generalisability of the results.

444 **Response Bias:** Using anonymous self-reported data may lead to response bias, where  
445 participants provide socially acceptable or inaccurate answers.

446 **Unpublished data:** Use of unpublished TIPI norms provided by Gosling et al. for comparison  
447 purposes (17). While these norms are widely referenced in personality research, their  
448 unpublished status means that they may not have been subjected to the same rigorous peer  
449 review as published data. This could introduce some uncertainty regarding the accuracy or  
450 representativeness of the normative data used as a benchmark in this study.

451 **Lack of Insights from Dropouts:** The survey did not include insights from individuals who  
452 stopped pursuing multi-marathoning, limiting understanding of factors influencing  
453 participation and retention.

454 Despite these limitations, the study offers important insights into different aspects of multi-  
455 marathoning, setting the stage for future research, which should consider longitudinal designs  
456 and objective measures of psychological health to build on the findings of this study.

#### 457 [Research/Policy implications](#)

458 Until now, the absence of peer-reviewed research has resulted in a lack of understanding of  
459 nature of the sport.

460 Multi-marathon participants and those involved in multi-marathon governance, in the provision  
461 of multi-marathon events, or health professionals, may utilise the recommendations given in  
462 this study to better plan their contribution to the sport and its overall safety, policies and  
463 organisation.

#### 464 [Conclusion](#)

465 This study highlights distinctive personality profiles among multi-marathoners, characterised  
466 by high conscientiousness and lower emotional stability. These traits underline the importance  
467 of self-discipline in meeting the demands of multi-marathoning while also pointing to potential  
468 psychological challenges in stress management. Contrary to initial expectations, no significant  
469 differences were found in openness or in the interaction between age and personality traits,  
470 suggesting that the relationship between personality and multi-marathoning may be more  
471 complex than previously thought.

472 By applying the Big Five Personality Theory and Goal Setting Theory, the research provides  
473 insights that can guide the development of targeted interventions to support the well-being and  
474 performance of multi-marathoners. Practical implications include the need for structured

475 training programs and stress management resources to help athletes maintain both their  
476 physical and mental health.

477 Future research should explore longitudinal changes in personality traits and test the  
478 effectiveness of psychological interventions. Additionally, broadening the diversity of study  
479 samples will enhance the generalisability of these findings across the global multi-marathon  
480 community.

481 In conclusion, while personality traits such as conscientiousness and emotional stability play a  
482 significant role in shaping the experiences and outcomes of multi-marathoners, the anticipated  
483 effects of openness and age on personality were not confirmed, offering a refined perspective  
484 for sports psychology and endurance sports research.

#### 485 **Abbreviation**

486 FREC: Faculty of Health Sciences Research Ethics Committee

487 TIPI: Ten Item Personality Inventory

#### 488 **Acknowledgments**

489 The authors of this study would like to offer thanks to all study participants for their  
490 contribution to this research.

491 **Patient consent for publication:** Not applicable

492 **Provenance and peer review:** Not commissioned, peer-reviewed

493 **Data availability statement:** Data are available in line with PLoS ONE policy

494 **Competing Interests:** No competing Interests



## 495 **Notes on Authors:**

496 **Leo Lundy**, BSc, is a PhD candidate at the School of Engineering at Trinity College, The University of Dublin.

497 **Richard Reilly**, PhD is Professor of Neural Engineering at Trinity College, The University of Dublin, a joint position between the School of  
498 Medicine and School of Engineering. He is Director and a principal investigator of the Trinity Centre for Bioengineering (TCBE) and a  
499 principal investigator at the Trinity College Institute of Neuroscience (TCIN). His research focuses on high-density electrophysiological and  
500 neuroimaging-based analysis of sensory and cognitive processing for clinical applications.

501 **Neil Fleming**, PhD is an assistant professor and director of the Human Performance Laboratory, Trinity College Dublin. Involved in  
502 neuromuscular physiology research within the School of Medicine.

503 **Dominika Wilczyńska**, PhD, Associate Professor, Faculty of Social and Humanities, University WSB Merito, 80-226 Gdańsk, Poland.  
504 Primary research focus is on positive sports psychology, to enhance well-being and reduce burnout in both young and adult athletes.

### 505 **ORCID iDs**

506 Leo Lundy <https://orcid.org/0009-0006-8145-7046>

507 Richard Reilly <https://orcid.org/0000-0001-8578-1245>

508 Dominika Wilczyńska <https://orcid.org/0000-0002-4332-0157>

## 509 **References**

- 510 1. Lundy L, Reilly RB. Demographics, culture and participatory nature of multi-marathoners-An  
511 observational study highlighting issues with recommendations. *PLoS One*. 2024;19(5):e0302602.
- 512 2. Reardon CL, Factor RM. Sport psychiatry: a systematic review of diagnosis and medical  
513 treatment of mental illness in athletes. *Sports Med*. 2010;40(11):961-80.
- 514 3. Rice SM, Purcell R, De Silva S, Mawren D, McGorry PD, Parker AG. The Mental Health of Elite  
515 Athletes: A Narrative Systematic Review. *Sports Med*. 2016;46(9):1333-53.
- 516 4. McCrae RRA, P.T., Jr.,. A five-factor theory of personality. *Handbook of Personality: Theory*  
517 *and Research*. 2008;3rd ed.:159-81.
- 518 5. Locke EA, G.P. *Goal Setting Theory: Theory building by induction*. : Oxford University Press;  
519 2005.
- 520 6. John OPaS, S. The Big Five trait taxonomy: History, measurement, and theoretical  
521 perspectives. *Handbook of Personality: Theory and Research* 1999(1(3)):pp. 102-38.
- 522 7. Cervone D, & Pervin, L. A. . *Personality: Theory and research*. 14th Edition ed: John Wiley &  
523 Sons; 2022.
- 524 8. Sheldon KM, Prentice, M., and Osbaldiston, R. Goal striving. *Handbook of Individual*  
525 *Differences in Social Behavior* 2009:504-17.
- 526 9. Patricia C. Jackman AEW, Christian Swann, Noel E. Brick. Self-regulatory processes in goal  
527 striving during excellent distance running performances. *Psychology of Sport and Exercise*. 2024;70.
- 528 10. Stenling A, Lindwall, M., & Hassmén, P. . The application of Goal Setting Theory to goal  
529 setting interventions in sport: A systematic review. *Sport Psychology*. 2023.

- 530 11. Fenta B, Awoke, T., & Berhanu, A. . The relationship between personality traits and  
531 effectiveness of Ethiopian athletes in long distance running. *International Journal of Psychology and*  
532 *Psychoanalysis*. 2023.
- 533 12. Lopez A, & Sánchez, R. . Not so rebel after all: Profiling personality traits in mountain running  
534 athletes. *Retos*. 2023.
- 535 13. Steca P, Baretta, D., Greco, A., D’Addario, M., & Monzani, D. Associations between  
536 personality, sports participation and athletic success. A comparison of Big Five in sporting and non-  
537 sporting adults. *Personality and Individual Differences*. 2018;121:176-83.
- 538 14. 2023. The data for this paper was generated using Qualtrics software, Copyright © 2022  
539 Qualtrics. Qualtrics and all other Qualtrics products or service names are registered trademarks of  
540 Qualtrics, Provo, UT, USA.
- 541 15. Gosling SD, Rentfrow, P.J., and Swann, W.B., Jr. A very brief measure of the Big-Five  
542 personality domains. . *Journal of Research in Personality*. 2003(37(6)):p. 504-28.
- 543 16. Team RC. R: A language and environment for statistical computing. Vienna, Austria: R  
544 Foundation for Statistical Computing; 2023.
- 545 17. Gosling SD, Rentfrow, P. J., & Potter, J. Norms for the Ten Item Personality Inventory. 2014.
- 546 18. Nunnally JC, & Bernstein, I. H. *Psychometric Theory* New York: McGraw-Hill; 1994.
- 547 19. Conover WJ. *Practical Nonparametric Statistics*. 3rd Edition ed: Wiley; 1999.
- 548 20. Field A. *Discovering Statistics Using IBM SPSS Statistics* Sage Publications; 2018.
- 549 21. Maxwell SE, & Delaney, H. D. *Designing Experiments and Analyzing Data: A Model*  
550 *Comparison Perspective*: Routledge; 2004.
- 551 22. Spearman C. The proof and measurement of association between two things. *The American*  
552 *Journal of Psychology*. 1904.
- 553 23. Marathons M. World Rankings 2022 [Available from:  
554 [https://www.100marathonclub.org.uk/files/user\\_uploaded/article\\_files/1676996476/WMMR%20300+%202022-12-31%20over1%20Global%20only.pdf](https://www.100marathonclub.org.uk/files/user_uploaded/article_files/1676996476/WMMR%20300+%202022-12-31%20over1%20Global%20only.pdf).  
555 [https://www.100marathonclub.org.uk/files/user\\_uploaded/article\\_files/1676996476/WMMR%20300+%202022-12-31%20over1%20Global%20only.pdf](https://www.100marathonclub.org.uk/files/user_uploaded/article_files/1676996476/WMMR%20300+%202022-12-31%20over1%20Global%20only.pdf).]
- 556 24. Kemper CJ, Trapp S, Kathmann N, Samuel DB, Ziegler M. Short Versus Long Scales in Clinical  
557 Assessment: Exploring the Trade-Off Between Resources Saved and Psychometric Quality Lost Using  
558 Two Measures of Obsessive-Compulsive Symptoms. *Assessment*. 2019;26(5):767-82.
- 559 25. Crede M, Harms P, Niehorster S, Gaye-Valentine A. An evaluation of the consequences of  
560 using short measures of the Big Five personality traits. *J Pers Soc Psychol*. 2012;102(4):874-88.
- 561 26. Lazarus RS, & Folkman, S. *Stress, Appraisal, and Coping*. . New York: Springer Publishing  
562 Company.; 1984.
- 563 27. Fletcher D, & Sarkar, M. A grounded theory of psychological resilience in Olympic  
564 champions. *Psychol Sport Exerc*. 2012;13(5):669-78.

565

Here are a number of personality traits that may or may not apply to you. You should rate the extent to which the pair of traits applies to you, even if one characteristic applies more strongly than the other.

I see myself as:

|                                         | Disagree<br>strongly<br>(1) | Disagree<br>Moderately<br>(2) | Disagree<br>a little<br>(3) | Neither<br>agree<br>nor<br>disagree<br>(4) | Agree<br>a little<br>(5) | Agree<br>moderately<br>(6) | Agree<br>strongly<br>(7) |
|-----------------------------------------|-----------------------------|-------------------------------|-----------------------------|--------------------------------------------|--------------------------|----------------------------|--------------------------|
| Extraverted,<br>enthusiastic.           | <input type="radio"/>       | <input type="radio"/>         | <input type="radio"/>       | <input type="radio"/>                      | <input type="radio"/>    | <input type="radio"/>      | <input type="radio"/>    |
| Critical,<br>quarrelsome.               | <input type="radio"/>       | <input type="radio"/>         | <input type="radio"/>       | <input type="radio"/>                      | <input type="radio"/>    | <input type="radio"/>      | <input type="radio"/>    |
| Dependable,<br>self-<br>disciplined.    | <input type="radio"/>       | <input type="radio"/>         | <input type="radio"/>       | <input type="radio"/>                      | <input type="radio"/>    | <input type="radio"/>      | <input type="radio"/>    |
| Anxious,<br>easily upset.               | <input type="radio"/>       | <input type="radio"/>         | <input type="radio"/>       | <input type="radio"/>                      | <input type="radio"/>    | <input type="radio"/>      | <input type="radio"/>    |
| Open to new<br>experiences,<br>complex. | <input type="radio"/>       | <input type="radio"/>         | <input type="radio"/>       | <input type="radio"/>                      | <input type="radio"/>    | <input type="radio"/>      | <input type="radio"/>    |
| Reserved,<br>quiet.                     | <input type="radio"/>       | <input type="radio"/>         | <input type="radio"/>       | <input type="radio"/>                      | <input type="radio"/>    | <input type="radio"/>      | <input type="radio"/>    |
| Sympathetic,<br>warm.                   | <input type="radio"/>       | <input type="radio"/>         | <input type="radio"/>       | <input type="radio"/>                      | <input type="radio"/>    | <input type="radio"/>      | <input type="radio"/>    |
| Disorganized,<br>careless.              | <input type="radio"/>       | <input type="radio"/>         | <input type="radio"/>       | <input type="radio"/>                      | <input type="radio"/>    | <input type="radio"/>      | <input type="radio"/>    |
| Calm,<br>emotionally<br>stable.         | <input type="radio"/>       | <input type="radio"/>         | <input type="radio"/>       | <input type="radio"/>                      | <input type="radio"/>    | <input type="radio"/>      | <input type="radio"/>    |
| Conventional,<br>uncreative.            | <input type="radio"/>       | <input type="radio"/>         | <input type="radio"/>       | <input type="radio"/>                      | <input type="radio"/>    | <input type="radio"/>      | <input type="radio"/>    |

Figure 1

| Age Group    | n      | Extraversion (M/SD) |             | Agreeableness (M/SD) |             | Conscientiousness (M/SD) |             | Emotion (M/SD) |             | Openness (M/SD) |             |
|--------------|--------|---------------------|-------------|----------------------|-------------|--------------------------|-------------|----------------|-------------|-----------------|-------------|
|              |        | Survey              | Normative   | Survey               | Normative   | Survey                   | Normative   | Survey         | Normative   | Survey          | Normative   |
| 21 to 30     | 47038  | (4.75/1.41)         | (4.67/1.41) | (3.43/1.30)          | (4.46/1.29) | (5.11/1.06)              | (4.76/1.41) | (3.25/1.36)    | (4.95/1.41) | (3.99/1.06)     | (3.93/1.11) |
| 31 to 40     | 277042 | (4.46/1.07)         | (4.17/1.04) | (3.37/1.11)          | (3.94/1.20) | (5.11/1.10)              | (4.97/1.41) | (3.32/1.01)    | (4.25/1.41) | (4.95/1.07)     | (3.49/1.10) |
| 41 to 50     | 89383  | (4.02/1.02)         | (4.17/1.04) | (3.75/1.10)          | (3.85/1.17) | (5.03/1.10)              | (5.01/1.30) | (3.89/1.01)    | (4.40/1.41) | (5.38/1.02)     | (3.44/1.11) |
| 51 to 60     | 111500 | (3.93/1.11)         | (4.18/1.01) | (3.42/1.07)          | (3.43/1.14) | (4.93/1.06)              | (5.35/1.11) | (3.85/1.07)    | (4.88/1.41) | (4.45/1.06)     | (3.43/1.11) |
| 61 and older | 85380  | (3.75/1.30)         | (4.11/1.11) | (3.41/1.01)          | (3.71/1.11) | (4.93/1.01)              | (5.35/1.11) | (3.45/1.01)    | (4.84/1.41) | (3.74/1.01)     | (3.39/1.11) |

  

| Person       | n                | Extraversion (M/SD) |             | Agreeableness (M/SD) |             | Conscientiousness (M/SD) |             | Emotional Stability (M/SD) |             | Openness (M/SD) |             |
|--------------|------------------|---------------------|-------------|----------------------|-------------|--------------------------|-------------|----------------------------|-------------|-----------------|-------------|
|              |                  | Survey              | Normative   | Survey               | Normative   | Survey                   | Normative   | Survey                     | Normative   | Survey          | Normative   |
| Age Group    | Survey/Normative | Survey              | Normative   | Survey               | Normative   | Survey                   | Normative   | Survey                     | Normative   | Survey          | Normative   |
| 21 to 30     | (184075)         | (4.43/1.07)         | (4.17/1.04) | (3.41/1.11)          | (4.17/1.11) | (5.03/1.11)              | (4.97/1.41) | (3.31/1.01)                | (4.40/1.41) | (5.03/1.01)     | (3.49/1.11) |
| 31 to 40     | (187047)         | (4.53/1.11)         | (4.18/1.14) | (3.41/1.01)          | (4.17/1.11) | (5.03/1.11)              | (4.97/1.41) | (3.31/1.01)                | (4.40/1.41) | (5.03/1.01)     | (3.49/1.11) |
| 41 to 50     | (81798)          | (4.36/1.07)         | (4.18/1.14) | (3.41/1.11)          | (4.17/1.11) | (5.03/1.11)              | (4.97/1.41) | (3.31/1.01)                | (4.40/1.41) | (5.03/1.01)     | (3.49/1.11) |
| 51 to 60     | (88703)          | (4.27/1.01)         | (4.18/1.14) | (3.41/1.01)          | (4.17/1.11) | (5.03/1.11)              | (4.97/1.41) | (3.31/1.01)                | (4.40/1.41) | (5.03/1.01)     | (3.49/1.11) |
| 61 and older | (88790)          | (3.96/1.07)         | (4.18/1.14) | (3.41/1.01)          | (4.17/1.11) | (5.03/1.11)              | (4.97/1.41) | (3.31/1.01)                | (4.40/1.41) | (5.03/1.01)     | (3.49/1.11) |

Figure 2
